# Supplementary material for: Diagnosis and Antibiotic Treatment of Urinary Tract Infections in Danish General Practice: A Quality Assessment
Source: MDPI journal article supplement (doi:10.3390/antibiotics11121759), 2022-12-05
Supplement: s1 [file s1]

# Supplementary Material

## Suspected urinary tract infections in patients $\geq 18$ years

Register solely on the basis of the day of the first contact to general practice (day one)

| Patient information |                                           |                                                                                                                                                                                                                                                                                                                                                                                                                                                                                                                             |
|---------------------|-------------------------------------------|-----------------------------------------------------------------------------------------------------------------------------------------------------------------------------------------------------------------------------------------------------------------------------------------------------------------------------------------------------------------------------------------------------------------------------------------------------------------------------------------------------------------------------|
| 1                   | Patient age                               | _____ years                                                                                                                                                                                                                                                                                                                                                                                                                                                                                                                 |
| 2                   | Patient sex                               | <input type="checkbox"/> Female<br><input type="checkbox"/> Male                                                                                                                                                                                                                                                                                                                                                                                                                                                            |
| 3                   | Patient background<br>(choose at least 1) | <input type="checkbox"/> Nursing home resident<br><input type="checkbox"/> Urinary catheter<br><input type="checkbox"/> Recurring UTI<br><input type="checkbox"/> Comorbidity<br><input type="checkbox"/> Pregnant<br><input type="checkbox"/> Penicillin allergy<br><br><input type="checkbox"/> None of the above                                                                                                                                                                                                         |
| Symptoms and signs  |                                           |                                                                                                                                                                                                                                                                                                                                                                                                                                                                                                                             |
| 4                   | Symptoms and signs<br>(choose at least 1) | <input type="checkbox"/> Dysuria<br><input type="checkbox"/> Urgency<br><input type="checkbox"/> Frequency<br><input type="checkbox"/> New-onset incontinence<br><input type="checkbox"/> Suprapubic pain<br><input type="checkbox"/> Flank pain<br><input type="checkbox"/> Fever<br><input type="checkbox"/> Shivering<br><input type="checkbox"/> Systemically unwell<br><input type="checkbox"/> New-onset confusion<br><input type="checkbox"/> None of the above<br><br><input type="checkbox"/> No symptoms reported |
| Examinations        |                                           |                                                                                                                                                                                                                                                                                                                                                                                                                                                                                                                             |
| 5                   | Urinary dipstick<br>(choose at least 1)   | <b>Nitrite</b><br><input type="checkbox"/> Positive<br><input type="checkbox"/> Negative<br><b>Leukocytes</b><br><input type="checkbox"/> Positive<br><input type="checkbox"/> Negative<br><b>Hemoglobin</b><br><input type="checkbox"/> Positive<br><input type="checkbox"/> Negative<br><br><input type="checkbox"/> Not performed                                                                                                                                                                                        |

| Examinations (continued) |                                    |                                                                                                                                                                                                                                                                                                                   |
|--------------------------|------------------------------------|-------------------------------------------------------------------------------------------------------------------------------------------------------------------------------------------------------------------------------------------------------------------------------------------------------------------|
| 6                        | Microscopy<br>(choose only 1)      | <b>Microscopy</b><br><input type="checkbox"/> Positive<br><input type="checkbox"/> Negative<br><input type="checkbox"/> Inconclusive<br><br><input type="checkbox"/> Not performed                                                                                                                                |
| 7                        | Urine culture<br>(choose only 1)   | <input type="checkbox"/> Urine culture in general practice<br><input type="checkbox"/> Susceptibility testing in general practice<br><input type="checkbox"/> Urine sent to Department of Clinical Microbiology<br><br><input type="checkbox"/> Not performed                                                     |
| 8                        | CRP<br>(mg/l or 1 cross)           | CRP (value in mg/L) _____<br><br><input type="checkbox"/> Not performed                                                                                                                                                                                                                                           |
| Diagnose                 |                                    |                                                                                                                                                                                                                                                                                                                   |
| 9                        | Diagnose<br>(choose only 1)        | <input type="checkbox"/> Uncomplicated lower UTI<br><input type="checkbox"/> Complicated lower UTI<br><input type="checkbox"/> Pyelonephritis<br><input type="checkbox"/> Other, not UTI<br><input type="checkbox"/> Unresolved                                                                                   |
| Action                   |                                    |                                                                                                                                                                                                                                                                                                                   |
| 10                       | Hospitalisation<br>(choose only 1) | <input type="checkbox"/> Yes<br><input type="checkbox"/> No                                                                                                                                                                                                                                                       |
| 11                       | Antibiotics<br>(choose at least 1) | <input type="checkbox"/> Pivmecillinam<br><input type="checkbox"/> Sulfametizol<br><input type="checkbox"/> Nitrofurantoin<br><input type="checkbox"/> Trimethoprim<br><input type="checkbox"/> Ciprofloxacin<br><input type="checkbox"/> Other antibiotic<br><br><input type="checkbox"/> No antibiotics (day 1) |
